# Supplementary material for: Power Outages, Power Externalities, and Baby Booms
Source: Springer Nature journal article supplement (doi:10.1007/s13524-014-0316-7), 2014-07-09
Supplement: MOESM3 [file 6098558]

**Online Resource 3**

**Power Outages, Power Externalities, and Baby Booms**

Alfredo Burlando

Post-Blackout Time-Use Surveys

The second source of data is a time-use survey collected five months after the event to gather information on household responses to the blackout. The sample consists of 366 randomly selected households in 19 villages and towns selected from high, medium and low electricity coverage villages and neighborhoods. Twelve survey locations are rural or semirural villages from the North, East, and South of the island, and have electricity coverage varying from 0 % to 40 % of sampled households. The remaining seven areas are urban and peri-urban neighborhoods of the main town, where between 70 % and 100 % of sampled households are connected to the grid. The percentage of electricity coverage from the 2002 census was also matched to each community. (Not all communities were represented in the LFS survey, so communities were not matched with more recent electricity coverage estimates.)

In each visited household, both head and spouse were then asked specific information about their work in general and around the period of the blackout in particular. The respondents reported whether electricity is a critical input for each of no more than three of his/her income-generating activities. The respondents were then coded as “working with electricity” if any activity uses electricity. In addition, one of the two respondents provided information on family structure, asset ownership, income levels, education, religious practices, and use of electricity in their own home.

The two respondents were also asked to assess how many daily hours they spent in four categories of time use during the “usual weekday”: leisure hours spent at home, leisure hours spent outside of home, time spent doing household chores, and working hours. To estimate time use as accurately as possible, enumerators played a simple game with respondents. They first determined the amount of time available during the day by estimating the time respondents go to sleep and wake up in the morning. Having thus determined how many hours were available during the day, they provided an equal number of pebbles to the enumerators and then proceeded to allocate those pebbles on a board with four quadrants representing the four time-use categories. The enumerator then prodded and questioned the respondent until they were both satisfied that the board represented a fair assessment of the respondent’s time use. This process was carried out first to determine the usual hours spent before the blackout; in the second stage, respondents were asked to update the board by moving the pebbles to reflect changes to time use during the blackout.
